# Supplementary material for: New Terbium Complex as a Luminescent Sensor for the Highly Selective Detection of Malathion in Water Samples
Source: MDPI journal article supplement (doi:10.3390/chemosensors11120570), 2023-11-25
Supplement: s1 [file s1]

Supplementary Information

# New Terbium Complex as a Luminescent Sensor for the Highly Selective Detection of Malathion in Water Samples

Moustafa A. Rizk <sup>1,2,\*</sup>, Mabkhoot A. Alsaieri <sup>1</sup>, Raiedhah A. Alsaieri <sup>1</sup>, Ibrahim A. Ibrahim <sup>2</sup>, Abbas M. Abbas <sup>2</sup> and Gasser M. Khairy <sup>2,\*</sup>

<sup>1</sup> Department of Chemistry, Faculty of Science and Arts at Sharurah, Najran University, Najran 68342, Saudi Arabia; mamalsaiari@nu.edu.sa (M.A.A.); raalsayari@nu.edu.sa (R.A.A.)

<sup>2</sup> Department of Chemistry, Faculty of Science, Suez Canal University, Ismailia 41522, Egypt; ibrahim\_ali@science.suez.edu.eg (I.A.I.); abbasmamdoh@science.suez.edu.eg (A.M.A.)

\* Correspondence: marizk@nu.edu.sa (M.A.R.); gasser\_mostafa@science.suez.edu.eg (G.M.K.); Tel.: +966-560457015 (M.A.R.); +20-1022823954 (G.M.K.)

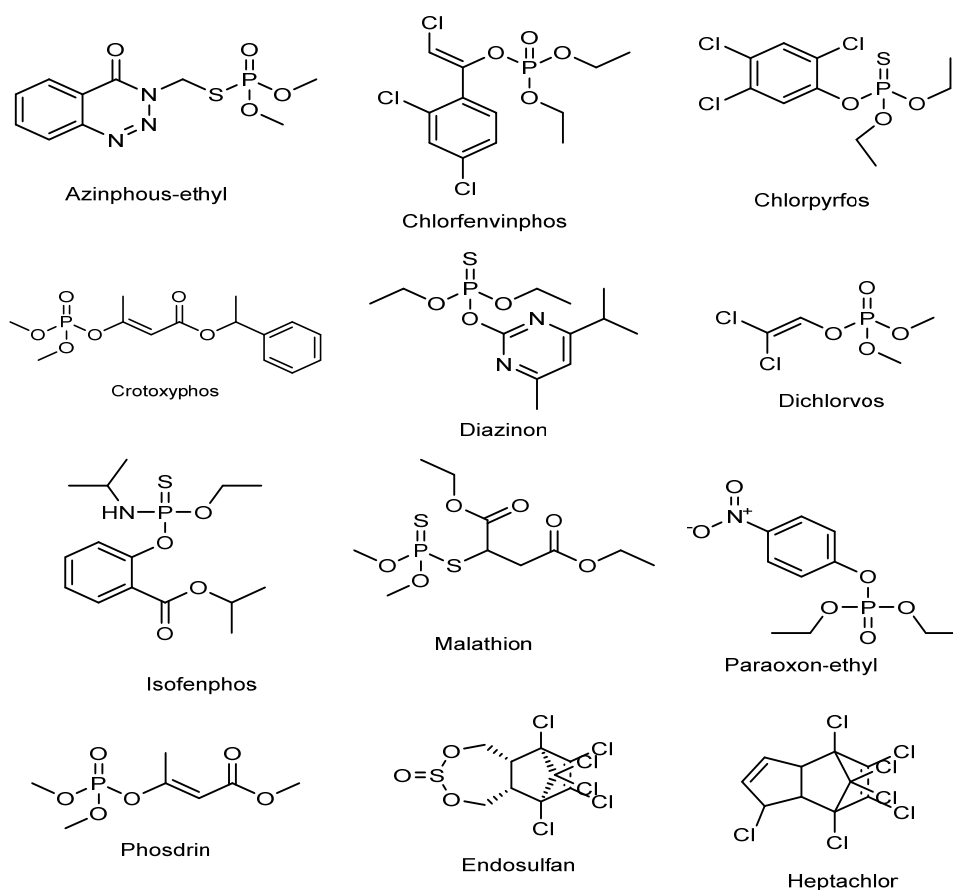

**Scheme S1.** The chemical structures of the organophosphorus pesticides.

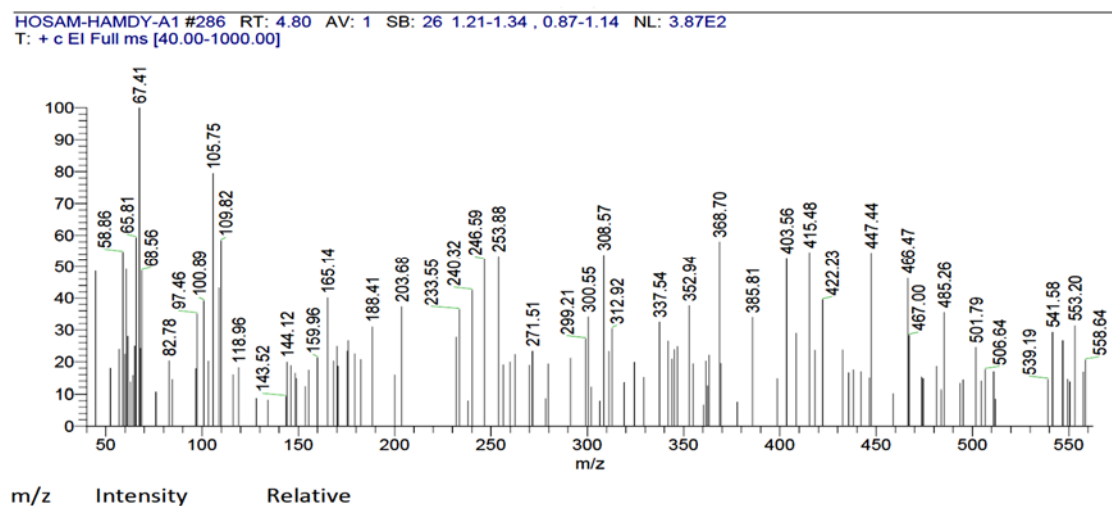

Figure S1. mass spectrum of the ligand.

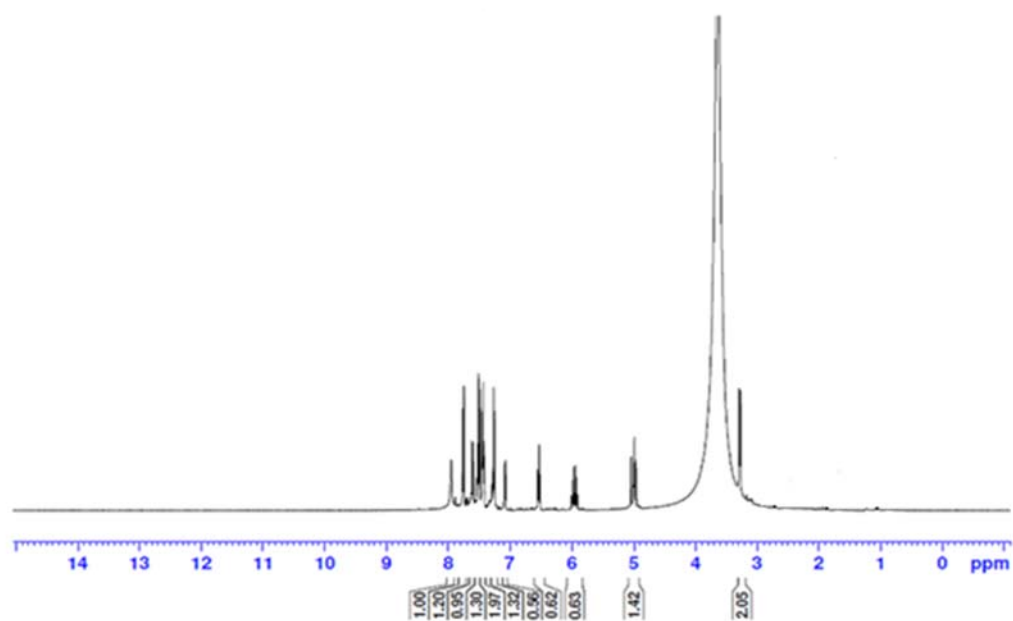

Figure S2. <sup>1</sup>H NMR of the ligand in DMSO-d<sub>6</sub>.

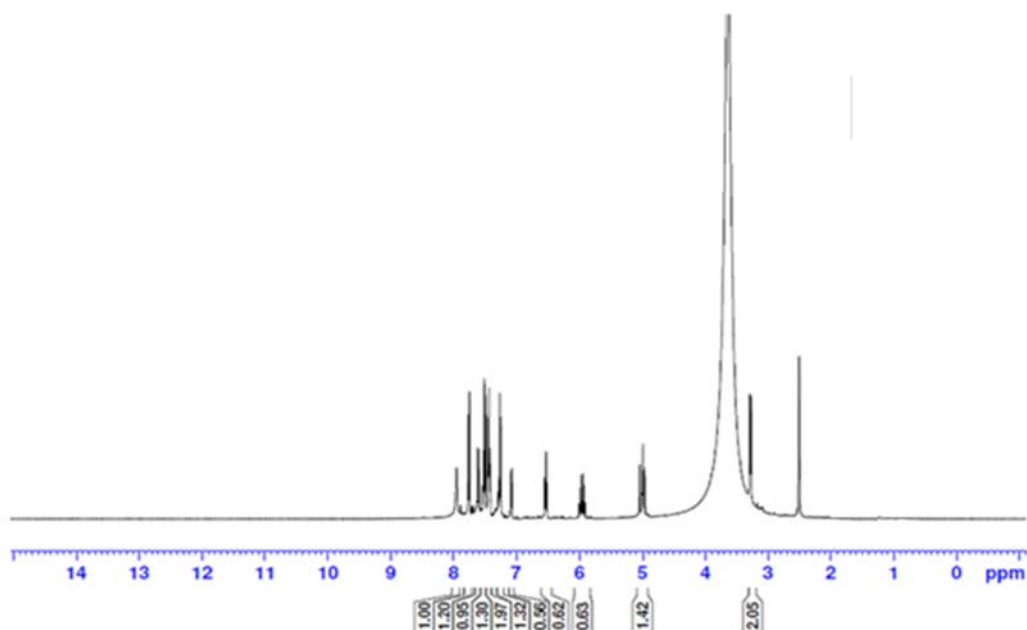

Figure S3.  $^1\text{H}$ NMR of the ligand in DMSO- $d_6$  +  $\text{D}_2\text{O}$ .

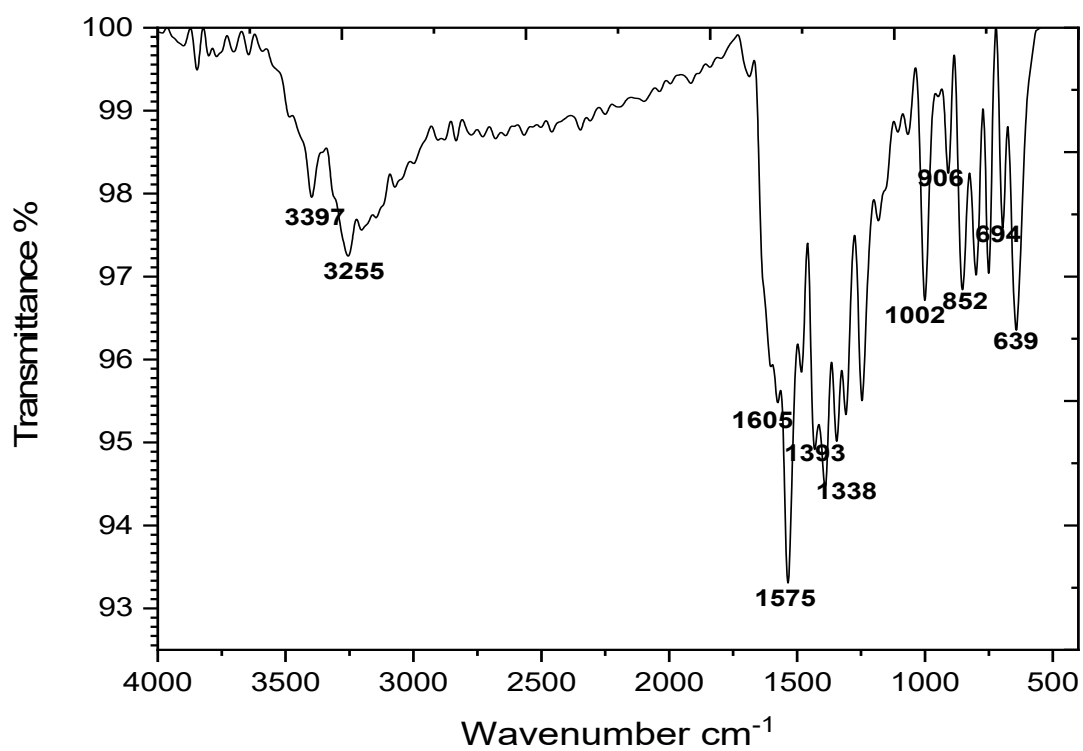

Figure S4. IR spectrum of the ligand.

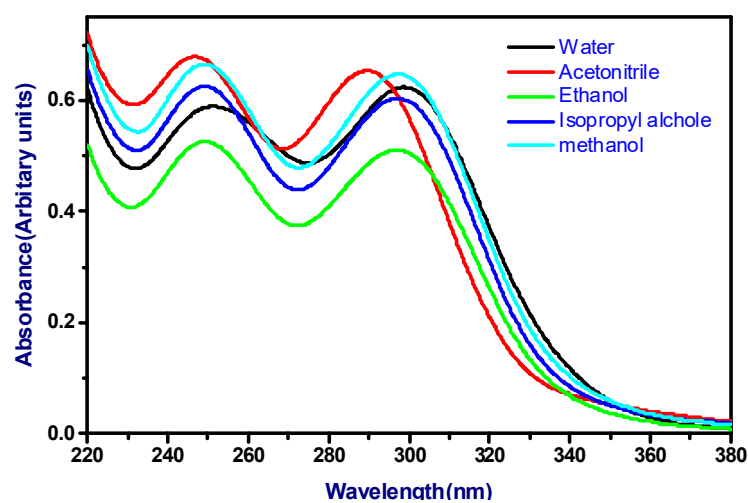

Figure S5. UV-spectra of  $5 \times 10^{-5}$  M  $H_2DBAZ$  in different solvents at room temperature.

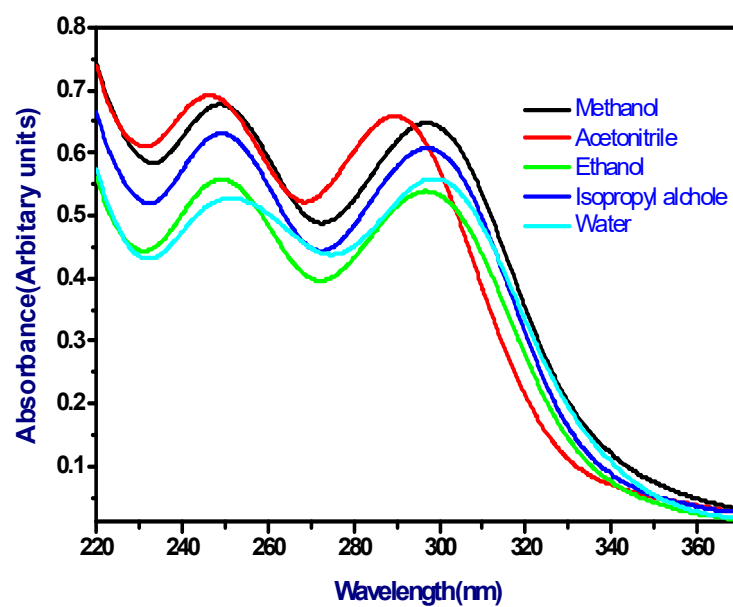

Figure S6. UV-spectra of  $5 \times 10^{-5}$  M  $Tb(III)$ -DBAZ complex in different solvents at room temperature.

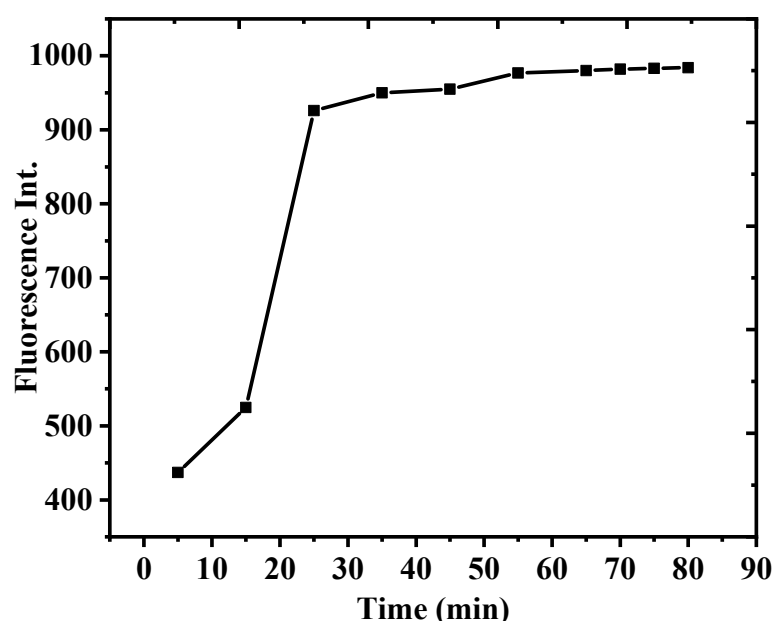

**Figure S7.** Effect of time on the luminescence intensity of  $5 \times 10^{-5}$  M of Tb(III)-(DBAZ) complex in methanol medium, sensitivity high,  $\lambda_{\text{ex}} = 360$  nm, at 25 °C.

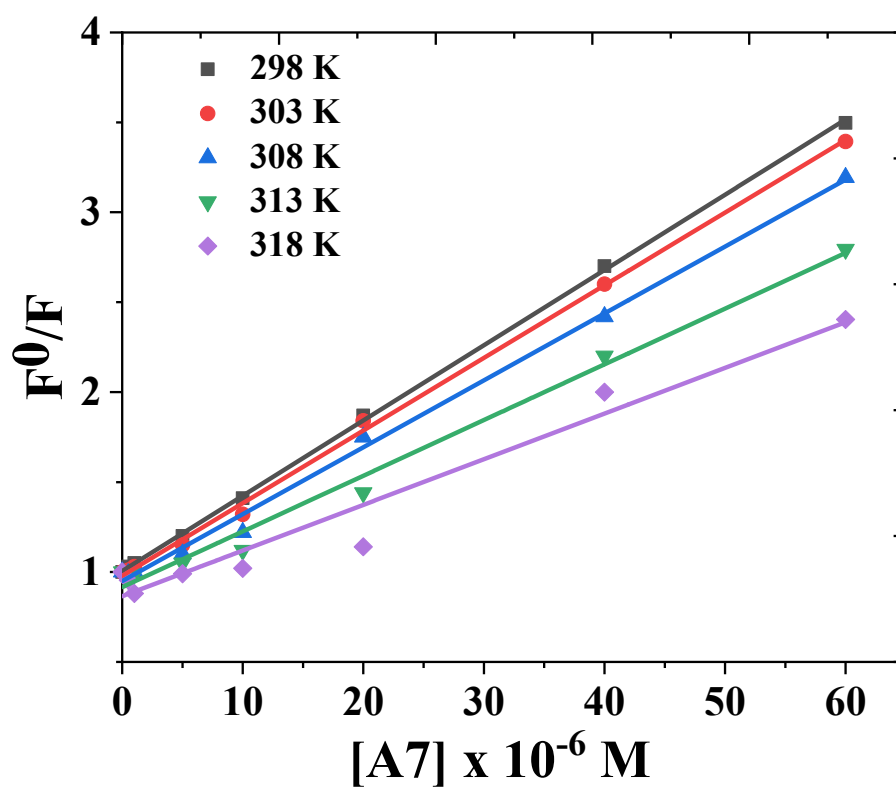

#

**Figure S8.**  $F_0/F$  against  $[A7]$  for Malathion upon its interaction with  $5 \times 10^{-5}$  M of Tb(III)-(DBAZ) complex in methanol at different temperatures,  $\lambda_{\text{ex}} = 360$  nm.

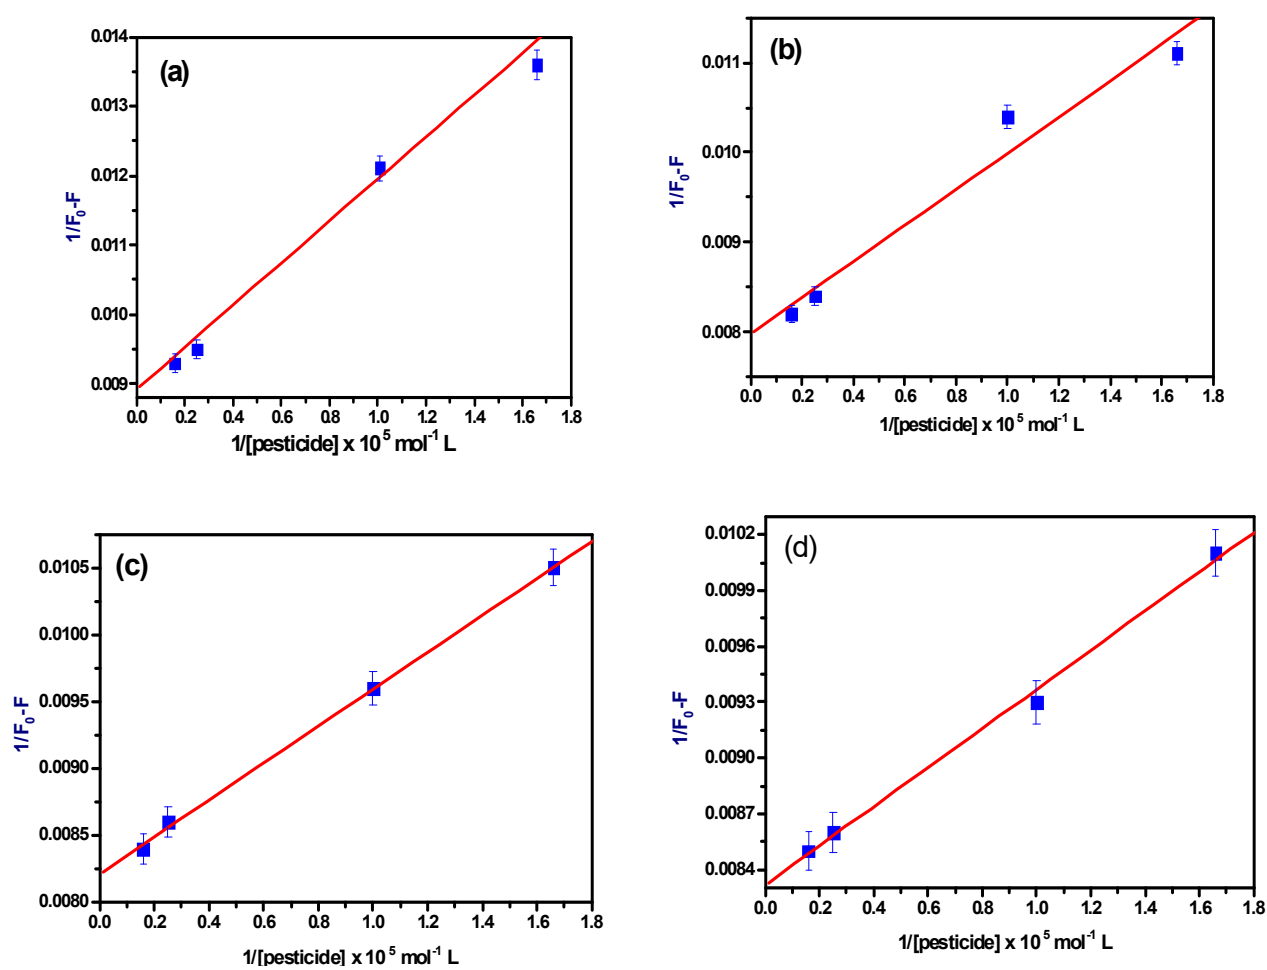

**Figure S9.**  $1/F_0 - F$  against  $1/[\text{pesticide}]$  for Malathion (A7) upon its interaction with  $5 \times 10^{-5} \text{ M}$  of Tb(III)-(DBAZ) at different temperatures, (a) at 303 K (b) at 308 K (c) at 313 K (d) at 318 K.
